# Supplementary material
Source: MDPI journal article supplement (https://www.mdpi.com/2073-4344/14/3/205)
Supplement: s1 [file s1]

# **Glu-Co-Assisted Iron-Based Metal–Organic Framework-Derived FeCo/N Co-Doped Carbon Material as Efficient Bifunctional Oxygen Electrocatalysts for Zn–Air Batteries**

**Pengfei Sha <sup>1</sup>, Xiao Yong <sup>1</sup>, Di Chen <sup>2</sup>, Xing Chen <sup>1</sup>, Fengying Yan <sup>1</sup>, Beili Pang <sup>1</sup>, Hongzhou Dong <sup>1</sup>, Jianhua Yu <sup>1</sup>, Liyan Yu <sup>1</sup> and Lifeng Dong <sup>1,3,\*</sup>**

<sup>1</sup> College of Materials Science and Engineering, Qingdao University of Science and Technology, Qingdao 266042, China

<sup>2</sup> Shandong Engineering Research Center of Green and High-Value Marine Fine Chemical, Weifang University of Science and Technology, Shouguang 262700, China

<sup>3</sup> Department of Physics, Hamline University, St. Paul, MN 55104, USA

\* Correspondence: ldong03@hamline.edu

## Figures

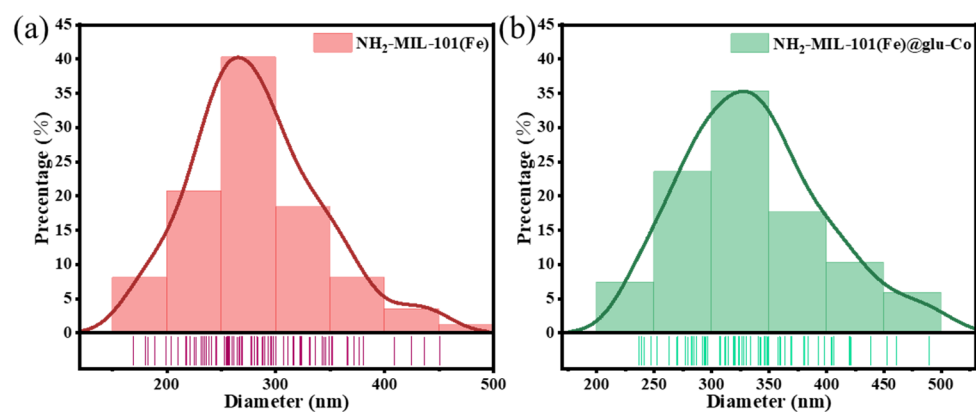

**Figure S1.** Particle size distribution plots showing the average size (based on measurements of over 50 particles) of (a)  $\text{NH}_2\text{-MIL-101(Fe)}$  and (b)  $\text{NH}_2\text{-MIL-101(Fe)@glu-Co}$ .

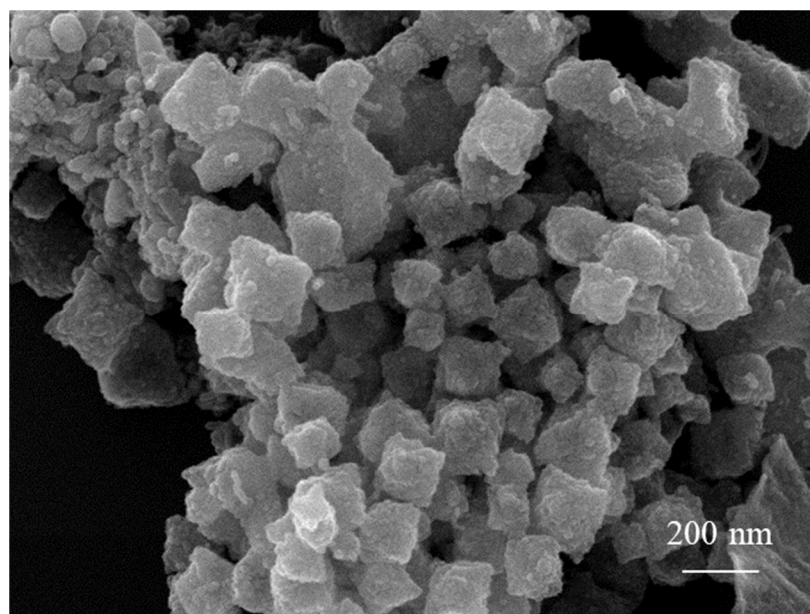

**Figure S2.** SEM image of Fe-C.

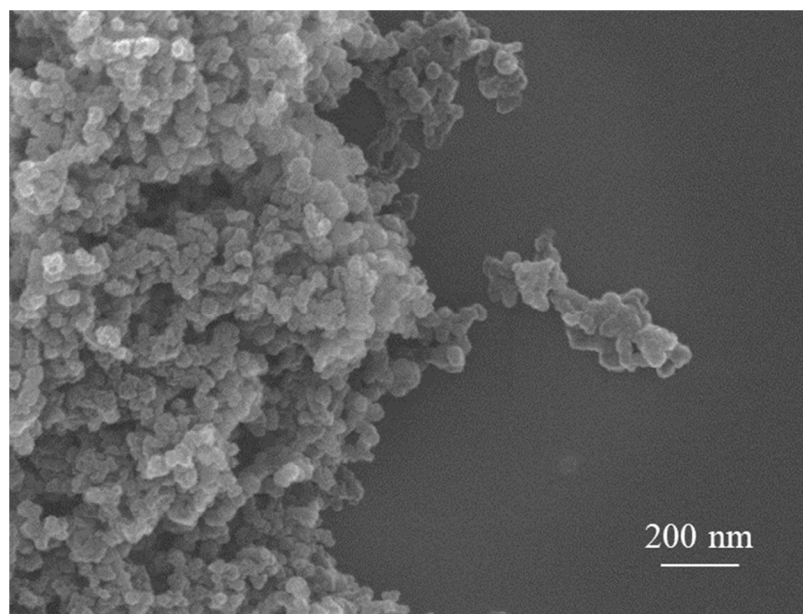

**Figure S3.** SEM image of KB.

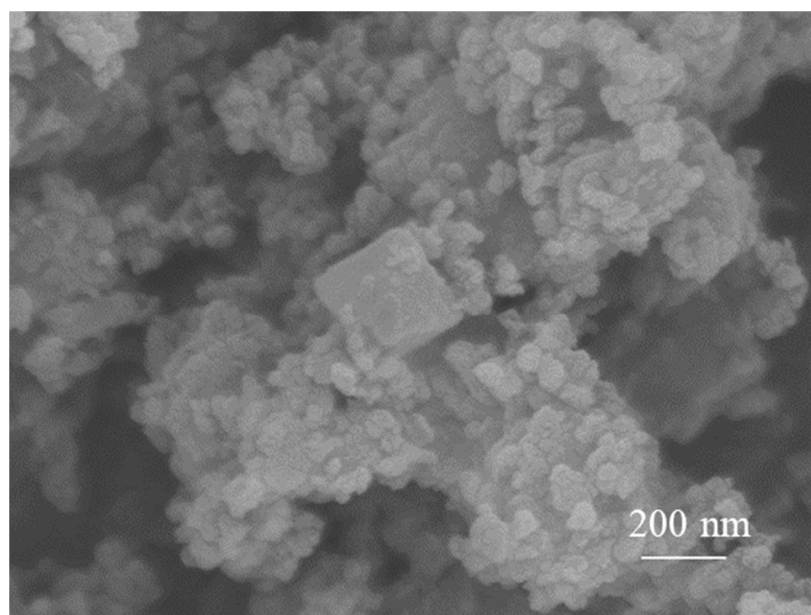

**Figure S4.** SEM image of NH<sub>2</sub>-MIL-101(Fe)@glu-Co/KB.

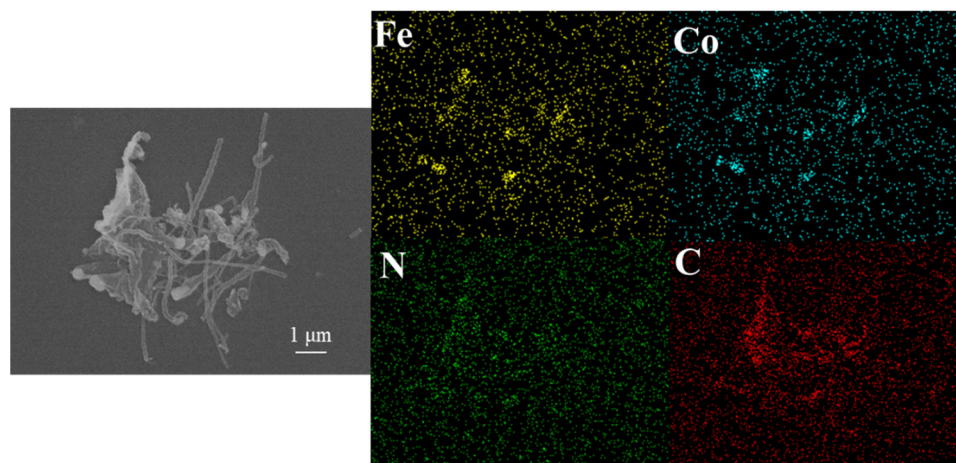

**Figure S5.** EDS elemental mapping images of Fe, Co, N and C of FeCo-CNTs.

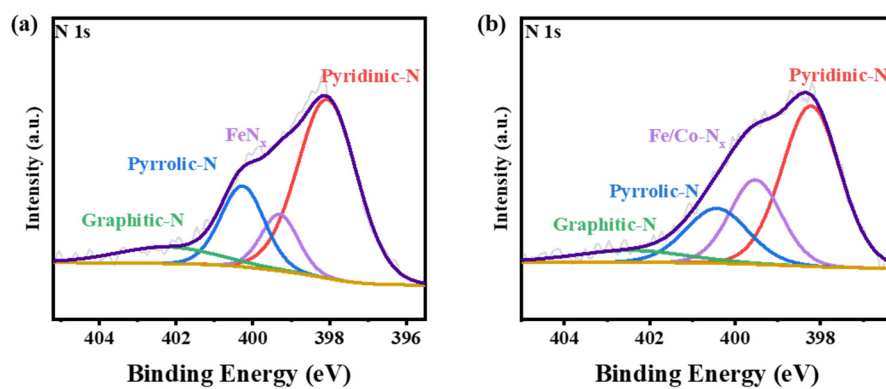

**Figure S6.** N 1s spectra of (a) Fe-C and (b) FeCo-CNTs.

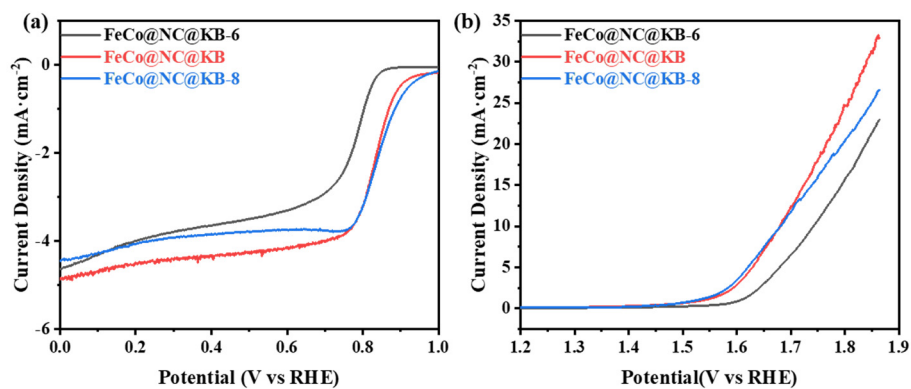

**Figure S7.** (a) ORR and (b) OER LSV curves of FeCo-CNTs/KB at different temperatures.

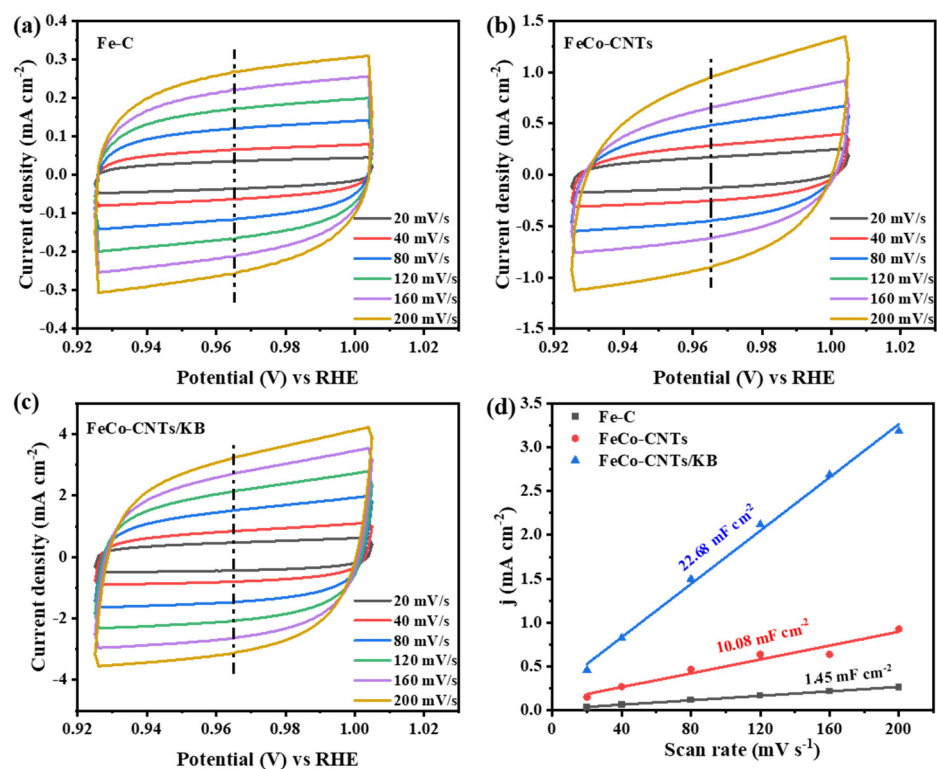

**Figure S8.** CVs measured at scan rates from 20 to 200  $\text{mV s}^{-1}$  for (a) Fe-C, (b) FeCo-CNTs and (c) FeCo-CNTs/KB in 1M KOH. (d) Current density (at 0.965 V) as a function of scan rate derived from (a) to (c).

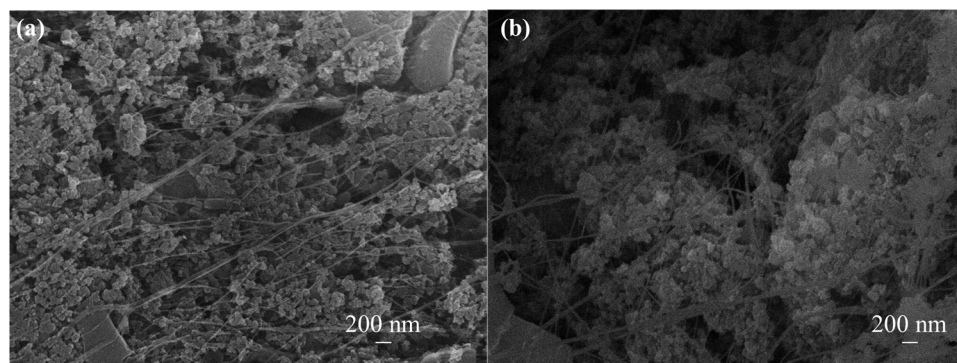

**Figure S9.** SEM images of cathode catalyst (a) before and (b) after cycling test.

## Tables

**Table S1.** Elemental compositions of FeCo-CNTs/KB from EDS analysis.

| Element | Weight% | Atomic% |
|---------|---------|---------|
| C       | 70.13   | 80.41   |
| N       | 16.72   | 16.44   |
| Fe      | 5.80    | 1.43    |
| Co      | 7.35    | 1.72    |

**Table S2.** Elemental compositions (atomic%) in Fe-C, FeCo-CNTs and FeCo-CNTs/KB.

|              | C       | N       | Fe      | Co     | O      |
|--------------|---------|---------|---------|--------|--------|
| Fe-C         | 71.98 % | 8.51 %  | 13.91 % |        | 5.59 % |
| FeCo-CNTs    | 86.98 % | 5.46 %  | 1.92 %  | 1.08 % | 4.57 % |
| FeCo-CNTs/KB | 81.47 % | 11.35 % | 2.31 %  | 1.88 % | 3.00 % |

**Table S3.** N-type contents in Fe-C, FeCo-CNTs and FeCo-CNTs/KB.

|              | Graphitic-N | Pyrrolic-N | M-N     | Pyridinic-N |
|--------------|-------------|------------|---------|-------------|
| Fe-C         | 5.35 %      | 20.90 %    | 6.94 %  | 66.82 %     |
| FeCo-CNTs    | 7.25 %      | 18.57 %    | 23.62 % | 50.56 %     |
| FeCo-CNTs/KB | 5.80 %      | 26.48 %    | 43.93 % | 23.78 %     |
